# Supplementary material for: Untangling interactions of a zinc(ii) complex containing a coumarin—porphyrin unit with alkaloids in water solutions: a photophysical study
Source: Royal Society of Chemistry journal article supplement (doi:10.1039/c4pp00359d), 2015-01-12
Supplement: c4pp00359d1.pdf [file c4pp00359d1.pdf]

## Untangling interactions of a Zinc(II) complex containing a coumarin-porphyrin unit with alkaloids in water solutions: A Photophysical study

Carla I. M. Santos<sup>a,b</sup>, Elisabete Oliveira<sup>a,b,c\*</sup>, Hugo M. Santos<sup>a,b</sup>, José C. J. M. D. S. Menezes<sup>d</sup>, M. Amparo F. Faustino<sup>d</sup>, José A. S. Cavaleiro<sup>d</sup>, J. L. Capelo<sup>a,b</sup>, M. Graça P. M. S. Neves<sup>d\*</sup>, Carlos Lodeiro<sup>a,b\*</sup>

<sup>a</sup> ProteoMass Scientific Society, Madan Parque, Rua dos Inventores, 2825-182, Caparica, Portugal.

<sup>b</sup> BIOSCOPE Group, UCIBIO-REQUIMTE, Chemistry Department, Faculty of Sciences and Technology, University NOVA of Lisbon, 2829-516, Caparica, Portugal. E. mail: [ej.oliveira@fct.unl.pt](mailto:ej.oliveira@fct.unl.pt) and [cle@fct.unl.pt](mailto:cle@fct.unl.pt).

<sup>c</sup> Veterinary Science Department and CECAV, University of Trás-os-Montes and Alto Douro, 5001-801, Vila Real, Portugal. E.mail: [ej.oliveira@fct.unl.pt](mailto:ej.oliveira@fct.unl.pt).

<sup>d</sup> Chemistry Department and QOPNA, University of Aveiro, 3810-193 Aveiro, Portugal. Email: [gneves@ua.pt](mailto:gneves@ua.pt).

**Determination of the detection (LOD) limit.** Ten different measurements of a solution containing the selected probe were collected, without addition of any alkaloid. For these values, the LOD was determined by the formula:

$Y_{dl} = y_{blank} + 3std$  where  $y_{dl}$  = signal detection limit and  $std$  = standard deviation

Additionally to a solution containing complex **1**, small amounts of the alkaloids were added in order to determine the minimal detectable amount out of the LOD value.

**Determination of the amount detectable in real samples by the Standard Addition Method.**

In the standard addition method, known quantities of the alkaloid are added to a solution of dam water containing the complex **1**. This method requires a linear response to analyte. A linear regression is plotted, and when  $y=0$ , the value of the unknown concentration of the alkaloid is obtained.

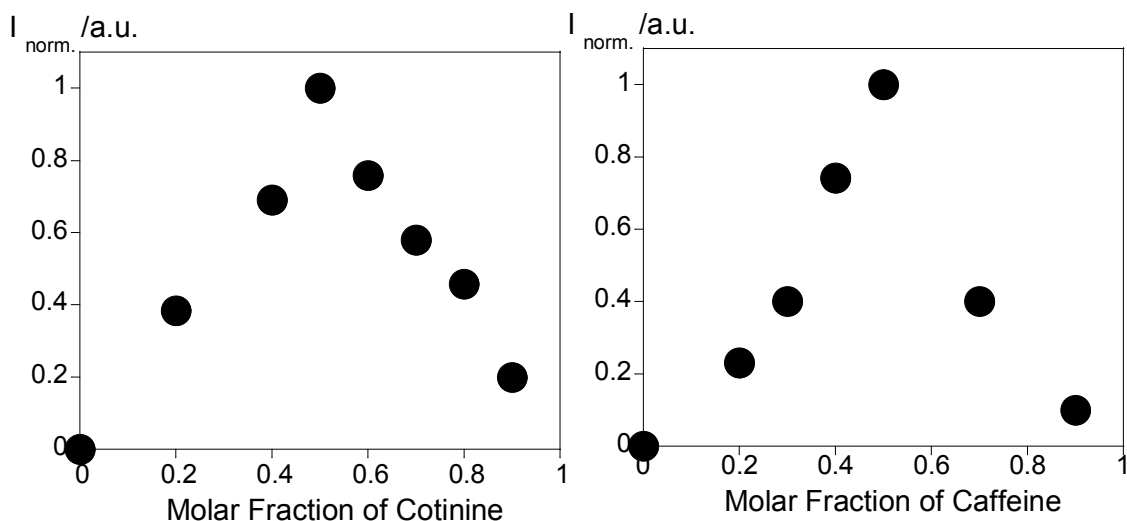

**Figure S11** – Job's plot of complex **1** upon addition of cotinine and caffeine in EtOH:H<sub>2</sub>O (50:50), ( $\lambda_{\text{exc}} = 608 \text{ nm}$ ).

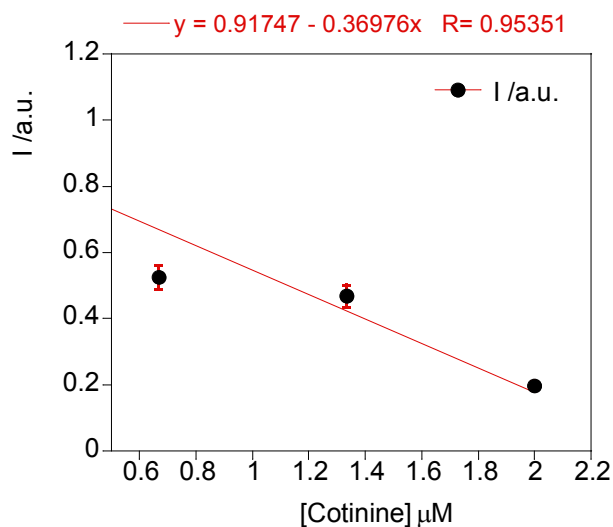

**Figure S12** – Standard addition method by emission of complex **1** upon the increasing addition of cotinine in dam water from the Vigia Dam located in the region of Montoito village, Alentejo district, Portugal ( $[1] = 5 \times 10^{-6} \text{ M}$ ,  $\lambda_{\text{exc}} = 555 \text{ nm}$ ,  $T = 298 \text{ K}$ ). Relative standard deviation (RSD) of the values was below 15 %,  $n = 3$ .
